# Supplementary material for: IMP/GTP balance modulates cytoophidium assembly and IMPDH activity
Source: PubMed Central journal article supplement (PMC6004095; doi:10.1186/s13008-018-0038-0), 2018-06-15
Supplement: 13008_2018_38_MOESM1_ESM.pdf [file 13008_2018_38_MOESM1_ESM.pdf]

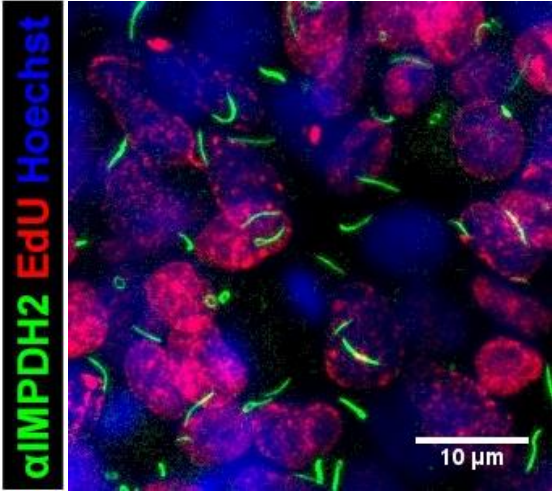

**Figure S1. dCTP treatment does not affect IMPDH-based cytoophidia in iPSCs.** Cells were treated with 1 mM dCTP for 4 hours and labelled with anti-IMPDH2 antibody and EdU.

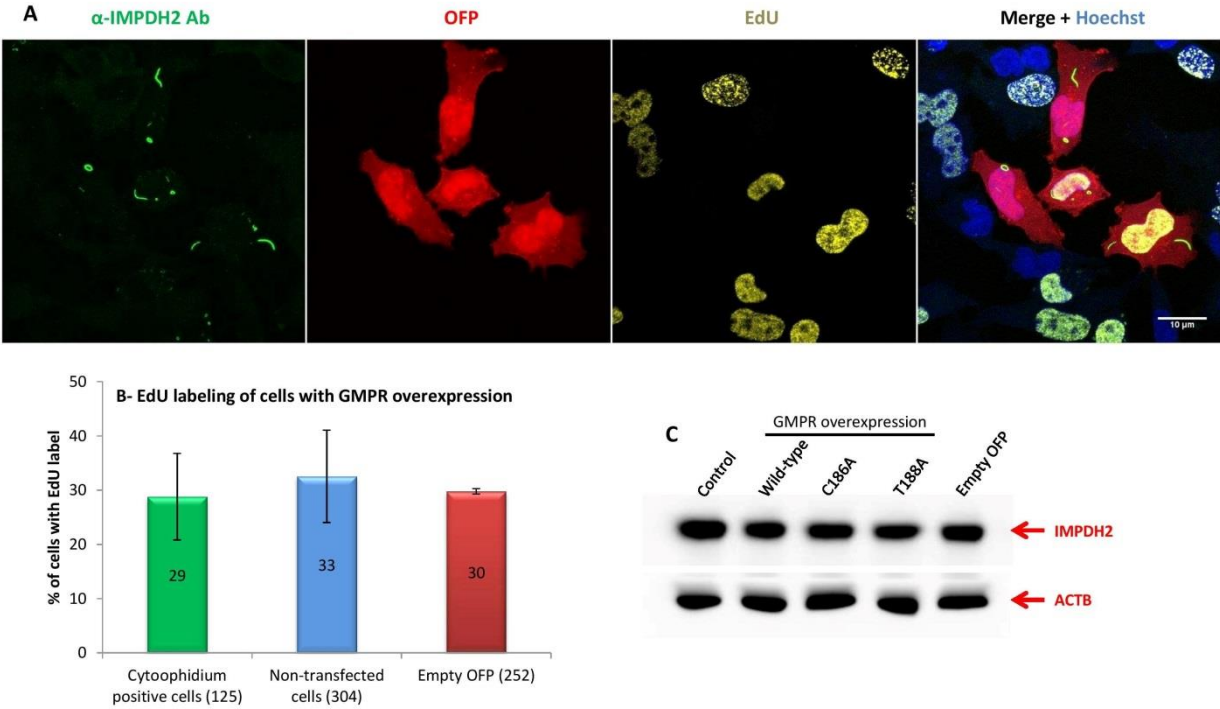

**Figure S2. Proliferation rate not affected by GMPR overexpression.** (A) HeLa cells expressing OFP-P2A-GMPR for 48 hours were labelled by EdU and anti-IMPDH2 antibody. (B) Mean ± SD of proportion of EdU labelling in cells presenting cytoophidia induced by GMPR overexpression, cells without transfection from the same experiment, or cells independently transfected with an empty OFP plasmid as control. Amount of cells counted in presented in brackets. (C) IMPDH2 protein level in cells transfected with different GMPR plasmids or empty OFP plasmid for 48 hours.

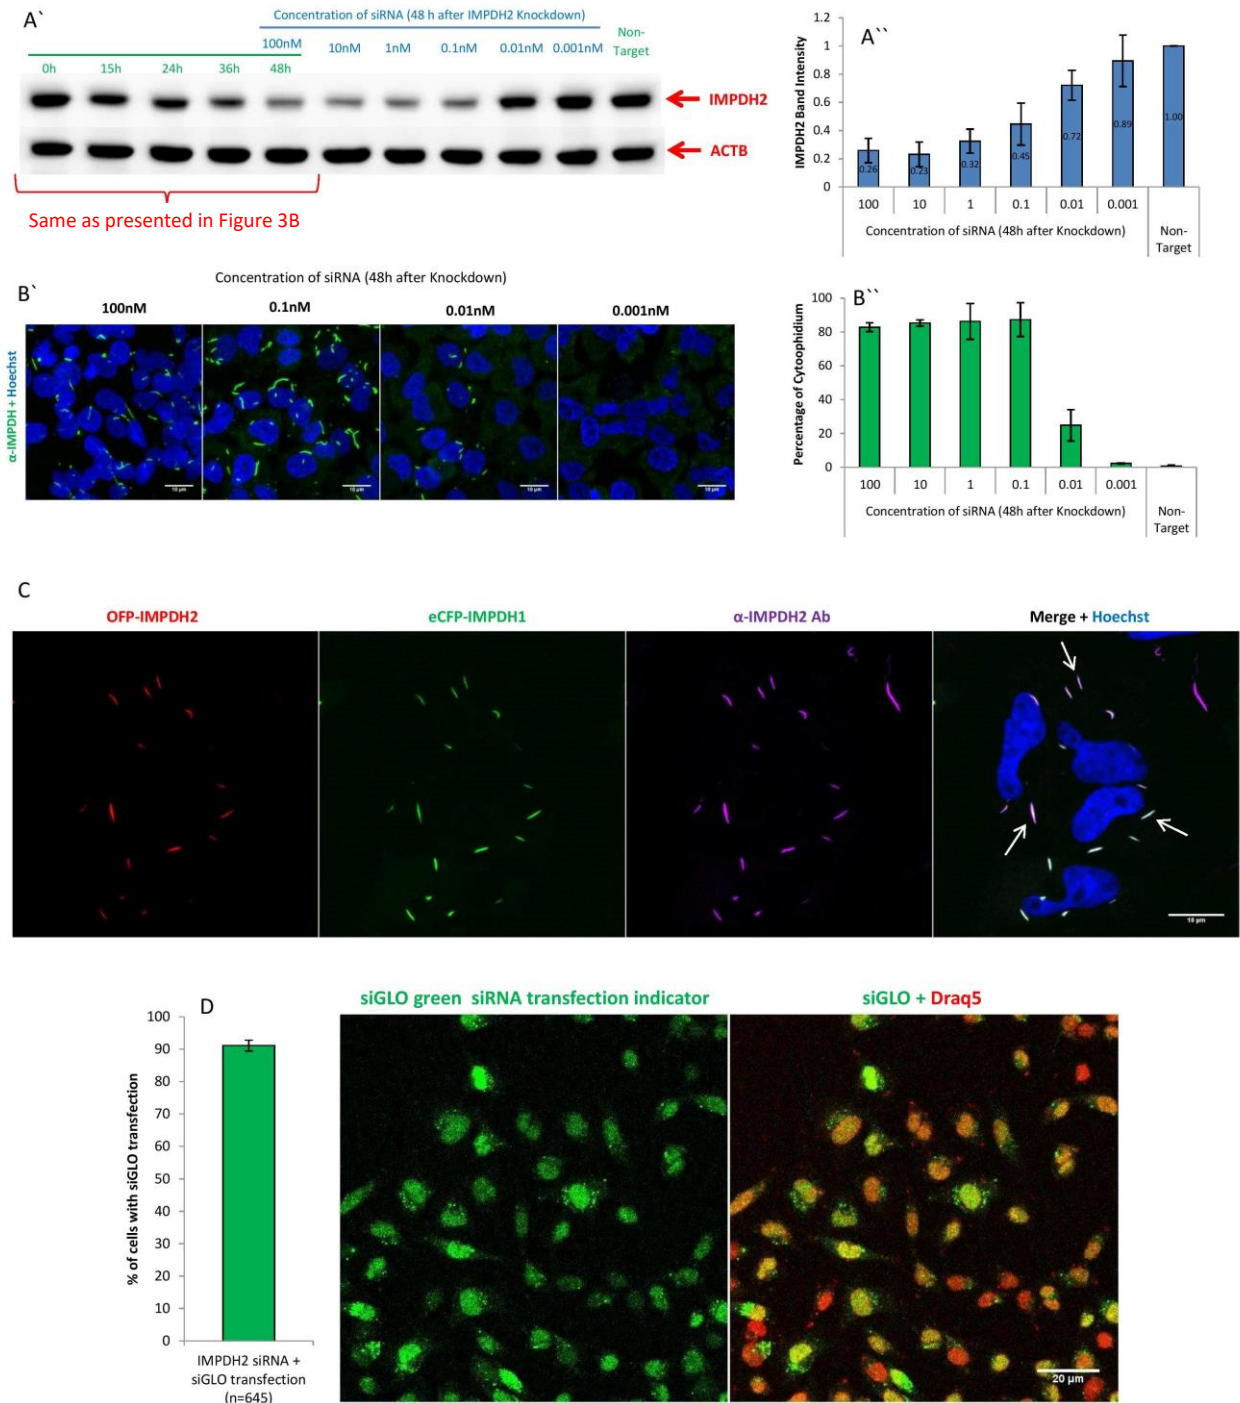

**Figure S3. IMPDH2 knockdown induces cytoophidium assembly.** (A) IMPDH2 protein levels in cells submitted to IMPDH2-Kd with different gradually decreasing concentrations of siRNA. (A') Quantitative data of (A). (B) Proportion of cytoophidium in cells submitted to IMPDH2-Kd with different gradually decreasing concentrations of siRNA. (B') Quantitative data of (B). (C) HeLa cells transfected with OFP-IMPDH2 and eCFP-IMPDH1 for 24 hours. Cells were treated with 500  $\mu$ M of ribavirin for 3 hours before fixation and probed with anti-IMPDH2 antibody. Arrows indicate cytoophidium labelled by OFP-IMPDH2, eCFP-IMPDH1 and anti-IMPDH2 antibody. (D) siGLO green was used to track siRNA transfection efficiency, which was >90%.

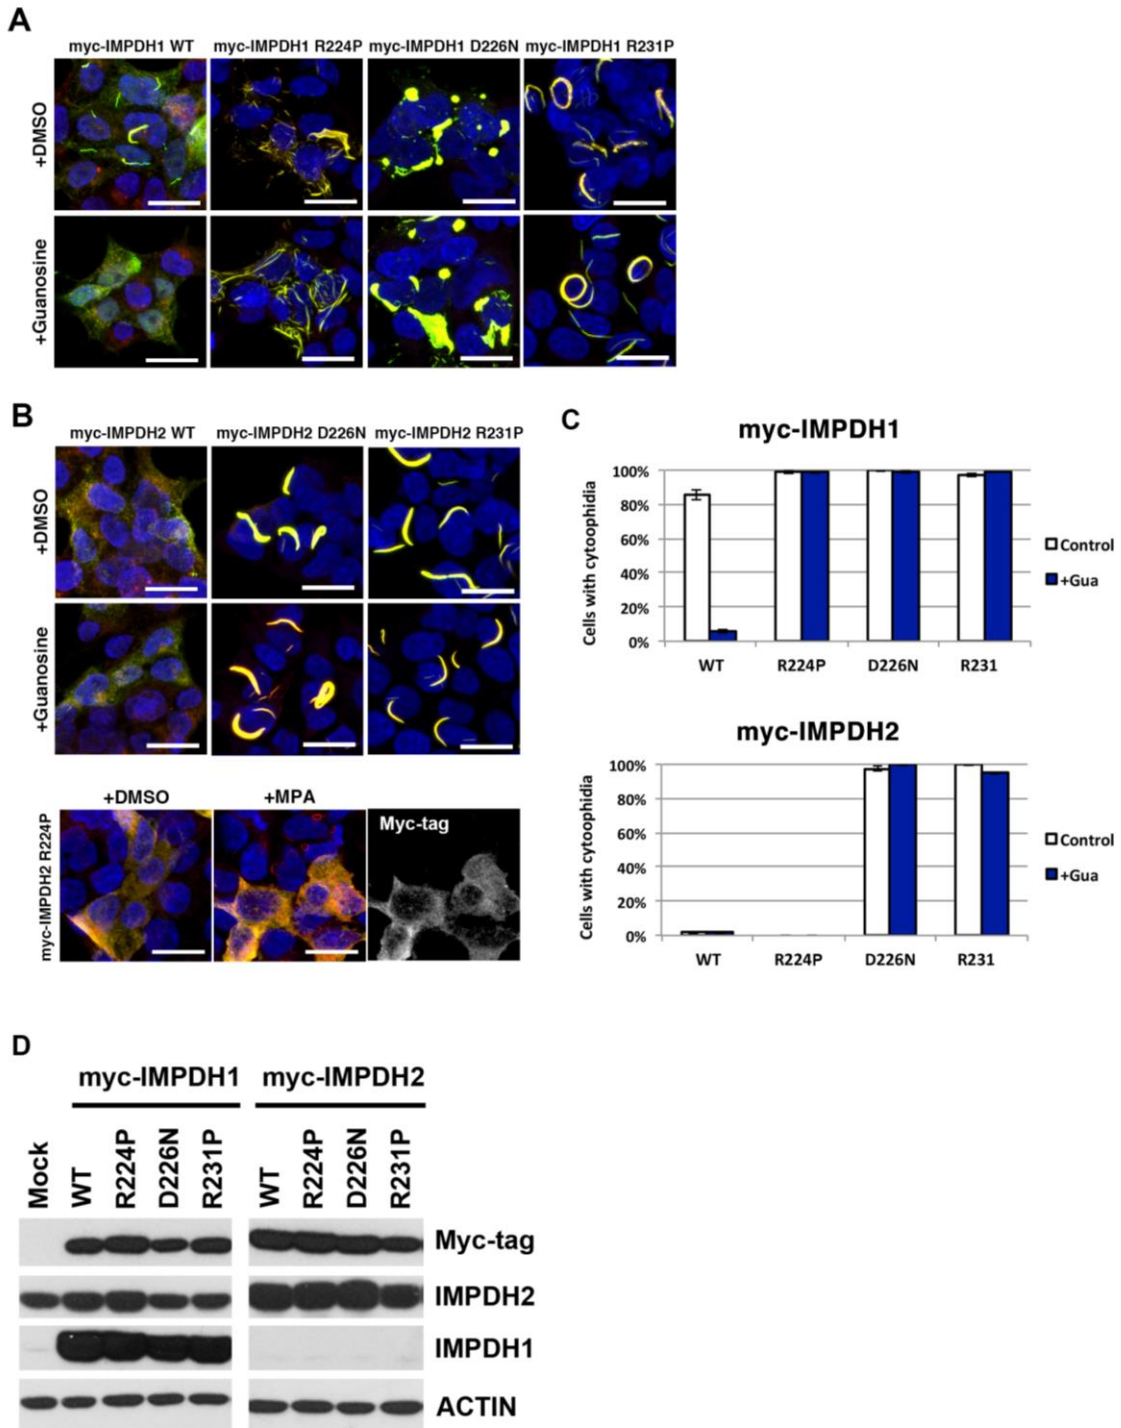

**Figure S4. Mutations on CBS domain of IMPDH isoforms result in distinct effects on cytophidium formation.** (A) Immunofluorescence for myc-tag antibody (green), IMPDH2 antibody (red) and DAPI (blue) in HEK 293T cells transfected with wt or mutant myc-IMPDPH1 plasmids. Cells were treated with DMSO or guanosine (100  $\mu$ M) for 1 hour before fixation (Scale bars = 20  $\mu$ m). (B) Immunofluorescence for myc-tag antibody (green), IMPDH2 antibody (red) and DAPI (blue) in HEK 293T cells transfected with wt or mutant myc-IMPDPH2 plasmids. Cells were treated with DMSO, guanosine (100  $\mu$ M) or MPA (100  $\mu$ M) for 1 hour before fixation (Scale bars = 20  $\mu$ m). (C) Mean  $\pm$  SEM quantitative results of cells with IMPDH cytophidia for groups shown in (A) and (B). (D) Expression levels for myc-IMPDPH1 and myc-IMPDPH2 wt and mutants.

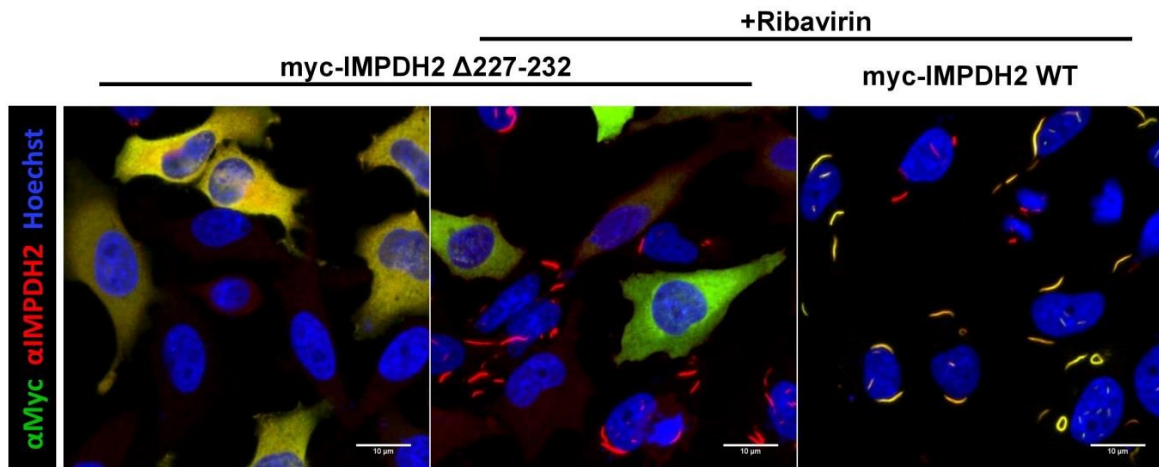

**Figure S5. Deletion of the 6 residues from 227 to 232 in myc-IMPDPH2 prevents cytoophidium assembly.** The myc-IMPDPH2  $\Delta$ 227-232 plasmid was delivered into HeLa cells for 24 hours followed by 1 mM ribavirin treatment for 4 hours before fixation. Cells were labelled with myc-tag antibody (green), IMPDPH2 antibody (red) and Hoechst (blue). While cytoophidia were observed in cells with myc-IMPDPH2\_WT overexpression under ribavirin treatment, no cytoophidium was observed in cells expressing myc-IMPDPH2  $\Delta$ 227-232 mutant under the same condition.

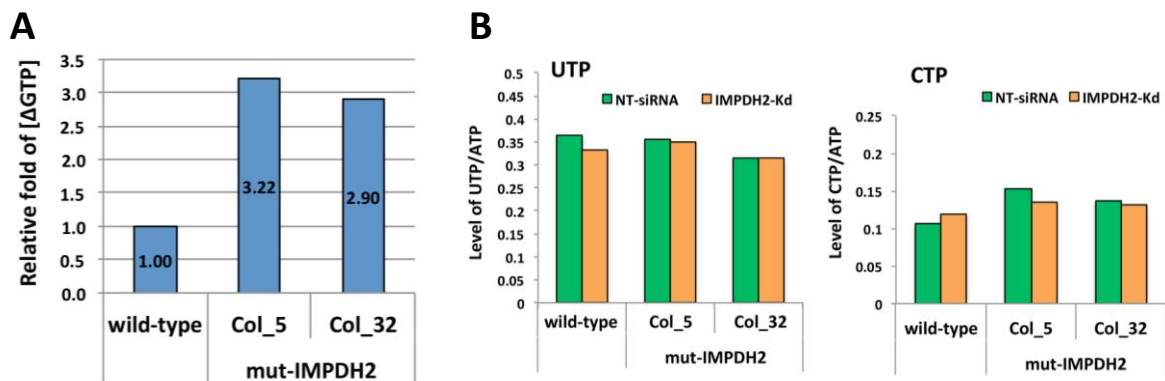

**Figure S6. Intracellular GTP level (but not UTP or CTP) significantly drops in no-cytoophidium mutant cells after IMPDPH2 knockdown.** (A) The difference of GTP level ( $\Delta$ GTP) between Non-Target and IMPDPH2 siRNA transfected conditions in wild-type and mutant HeLa cell lines. (B) Intracellular level of UTP and CTP (standardized with ATP) of wild-type and mutant cells after transfection of Non-Target or IMPDPH2 siRNA.

**Table S1.**

| <b>Primers used for RT-qPCR (5' -&gt; 3')</b>                                                 |                       |                                |                              |
|-----------------------------------------------------------------------------------------------|-----------------------|--------------------------------|------------------------------|
|                                                                                               | Target gene           | Forward Primer                 | Reverse Primer               |
| Primers for human HeLa cDNA                                                                   | IMPDH1                | TTCGTGCCCTACCTCATAGC           | ATGGACCGAAGGACAGACAG         |
|                                                                                               | IMPDH2                | AGTGGCTCCATCTGCATTACG          | ACCTTGTAACACTGCTGTTGCTTG     |
|                                                                                               | GAPDH                 | AACGGGAAGCTTGTCAATGGAAA        | GCATCAGCAGAGGGGGCAGAG        |
|                                                                                               | HPRT1                 | AGGCGAACCTCTCGGCTTTC           | CTAATCACGACGCCAGGGCT         |
| <b>sgRNAs for CRISPR/Cas9 genome editing (5' -&gt; 3')</b>                                    |                       |                                |                              |
|                                                                                               | Target IMPDH1 exon 11 | TCTGATACACCGAATTCCT            |                              |
|                                                                                               | Target IMPDH2 exon 7  | CGGACAGACCTGAAGAAGAAT          |                              |
| <b>Primers for PCR amplification of the DNA regions targeted by CRISPR/Cas9 (5' -&gt; 3')</b> |                       |                                |                              |
|                                                                                               |                       | Forward Primer                 | Reverse Primer               |
| IMPDH1                                                                                        |                       | AGACGTGGAGGAGAACCCTGGACCT      | CCCGAATTCGGCGGCCGCTCTAGAT    |
|                                                                                               |                       | TGAAGGACAGAAAAGGGTACTCAT       | ACAGTTTTTCATAGGATTTGAGGGGT   |
| IMPDH2                                                                                        |                       | AGACGTGGAGGAGAACCCTGGACCT      | CCCGAATTCGGCGGCCGCTCTAGAT    |
|                                                                                               |                       | AACTGGTCATAGTCGATGACTGGCC      | GTAAGTCTCAGACTGTGATGTGGCAGC  |
| <b>cDNA cloning for overexpression (5' -&gt; 3')</b>                                          |                       |                                |                              |
|                                                                                               |                       | Forward Primer                 | Reverse Primer               |
| Myc-IMPDH1                                                                                    |                       | TGACGCGTATGGAACAAAACTCATCTCAG  | CGCGGCCGCTGTCTCTCAG          |
|                                                                                               |                       | AAGAGGATCTGATGGCGGACTACCTGATCA | TACAGCCGCT                   |
| Myc-IMPDH2                                                                                    |                       | TGACGCGTATGGAACAAAACTCATCTCAG  | CGCGGCCGGGTGTGCTGGATCCCTTTTC |
| GMPR                                                                                          |                       | AGACGTGGAGGAGAACCCTGGACCT      | CCCGAATTCGGCGGCCGCTCTAGAT    |
|                                                                                               |                       | ATGCCCGCATAGATGCGGACCTCAA      | GCTGCTTTGTCCCCAGGGTTAGCTG    |
| <b>Predesigned siGENOME SMARTpool siRNA for IMPDH2 knockdown (5' -&gt; 3')</b>                |                       |                                |                              |
|                                                                                               |                       | GGACAGACCUGAAGAAGAA            | GCACGGCGUUUGGUGUUC           |
|                                                                                               |                       | GGAAAGUUGCCCAUUGUAA            | CUAAAGAAUAUCGCGGUA           |
